# Supplementary material for: Asbestos exposure and haematological malignancies: a Danish cohort study
Source: Springer Nature journal article supplement (doi:10.1007/s10654-020-00609-4), 2020-02-10
Supplement: MOESM1 [file 17666380]

Title

Asbestos exposure and haematological malignancies – a Danish cohort study

Authors

Else Toft Würtz<sup>1</sup>, Johnni Hansen<sup>2</sup>, Oluf Dimitri Røe<sup>3-4</sup>, Øyvind Omland<sup>1,5</sup>.

Affiliations

<sup>1</sup>Department of Occupational and Environmental Medicine, Danish Ramazzini Centre, Aalborg University Hospital, DK-9000 Aalborg, Denmark, <sup>2</sup>Danish Cancer Society Research Center, DK-2100 Copenhagen Ø, Denmark, <sup>3</sup>Department of Clinical Research and Molecular Medicine, Norwegian University of Science and Technology, N-7491 Trondheim, Norway, <sup>4</sup>Clinical Cancer Research Center, Department of Clinical Medicine, Aalborg University Hospital, DK-9000 Aalborg, Denmark, <sup>5</sup>Department of Clinical Medicine, Aalborg University, DK-9000 Aalborg, Denmark

Correspondence to: Else Toft Würtz [etw@rn.dk](mailto:etw@rn.dk)

Department of Occupational and Environmental Medicine, Aalborg University Hospital  
Havrevangen 1, DK-9000 Aalborg, Denmark

## SENSITIVITY ANALYSES

In the cause-specific HR, six sensitivity analyses were performed to consider different aspects of the study. First, the analysis was restricted to participants born in Denmark. This was done since Denmark has no recognised naturally occurring asbestos [23], and unknown natural asbestos exposure could be reduced by restricting the analysis to participants born in Denmark. Second, the analysis was restricted to schoolchildren born in parishes within a range of three kilometres from the DEF, combined with a reference cohort born in Denmark but outside these parishes. Third, the analysis was performed on participants born after January 1946 to ensure a possible uninterrupted environmental exposure as the DEF could not import asbestos during World War II. Furthermore, in 1964 these participants were 18 years old and expected to have a full employment history in the ATP (established in April 1964). In the fourth analysis, the missing occupational exposure among self-employed was analysed by assigning these participants to have no occupational exposure to asbestos; and in the fifth analysis, all to have an occupational asbestos exposure. The sixth analysis restricted the schoolchildren to the two schools closest to the DEF. All sensitivity analyses were conducted for all JEM1 and JEM2 models.

**Online resource 1: Sensitivity analyses: Cox regression of hematological malignancy as first cancer, with other cancers and death as competing-risk, with different job exposure matrix models for occupational asbestos exposure adjustment.**

| JEM1              |           | From Table 3 or 4 |      |             | First                  |      |             | Second                  |      |             | Third               |      |             | Fourth            |      |             | Fifth                 |      |             | Sixth                  |      |             |
|-------------------|-----------|-------------------|------|-------------|------------------------|------|-------------|-------------------------|------|-------------|---------------------|------|-------------|-------------------|------|-------------|-----------------------|------|-------------|------------------------|------|-------------|
|                   |           | 114,214           |      |             | 104,301                |      |             | 99,780                  |      |             | 85,614              |      |             | 121,098           |      |             | 121,098               |      |             | 108,217                |      |             |
|                   |           | Cases             | HR   | (95% CI)    | Cases                  | HR   | (95% CI)    | Cases                   | HR   | (95% CI)    | Cases               | HR   | (95% CI)    | Cases             | HR   | (95% CI)    | Cases                 | HR   | (95% CI)    | Cases                  | HR   | (95% CI)    |
|                   |           |                   |      |             | Schoolchildren born in |      |             | Born after January 1946 |      |             | ATP missing into no |      |             | ATP missing into  |      |             | Children from the two |      |             |                        |      |             |
|                   |           |                   |      |             | Born in Denmark (DK)   |      |             | Aalborg, others in DK   |      |             |                     |      |             | asbestos exposure |      |             | asbestos exposure     |      |             | schools closets to DEF |      |             |
| Population        | Reference | 989               | 1    |             | 936                    | 1    |             | 919                     | 1    |             | 587                 | 1    |             | 1015              | 1    |             | 1015                  | 1    |             | 989                    | 1    |             |
|                   | School    | 106               | 0.92 | (0.75-1.13) | 105                    | 0.92 | (0.75-1.12) | 76                      | 0.88 | (0.70-1.12) | 62                  | 0.87 | (0.67-1.13) | 110               | 0.94 | (0.77-1.15) | 110                   | 0.94 | (0.77-1.14) | 57                     | 0.93 | (0.71-1.22) |
| Sex               | Female    | 430               | 1    |             | 413                    | 1    |             | 395                     | 1    |             | 268                 | 1    |             | 446               | 1    |             | 446                   | 1    |             | 412                    | 1    |             |
|                   | Male      | 665               | 1.58 | (1.39-1.79) | 628                    | 1.56 | (1.37-1.78) | 600                     | 1.56 | (1.37-1.78) | 381                 | 1.42 | (1.21-1.67) | 679               | 1.56 | (1.38-1.76) | 679                   | 1.54 | (1.36-1.74) | 634                    | 1.56 | (1.37-1.77) |
| Asbestos exposure | No        | 935               | 1    |             | 884                    | 1    |             | 847                     | 1    |             | 554                 | 1    |             | 965               | 1    |             | 935                   | 1    |             | 894                    | 1    |             |
|                   | Yes       | 160               | 0.98 | (0.82-1.17) | 157                    | 0.99 | (0.83-1.18) | 148                     | 0.98 | (0.82-1.18) | 95                  | 1.09 | (0.87-1.37) | 160               | 0.98 | (0.82-1.16) | 190                   | 1.04 | (0.88-1.22) | 152                    | 1.01 | (0.84-1.20) |
| JEM1 >10 years    | Reference | 989               | 1    |             | 936                    | 1    |             | 919                     | 1    |             | 587                 | 1    |             | 1015              | 1    |             | 1015                  | 1    |             | 989                    | 1    |             |
|                   | School    | 106               | 0.92 | (0.75-1.12) | 105                    | 0.91 | (0.75-1.12) | 76                      | 0.88 | (0.69-1.11) | 62                  | 0.87 | (0.67-1.13) | 110               | 0.94 | (0.77-1.14) | 110                   | 0.94 | (0.77-1.14) | 57                     | 0.93 | (0.71-1.22) |
| Sex               | Female    | 430               | 1    |             | 413                    | 1    |             | 395                     | 1    |             | 268                 | 1    |             | 446               | 1    |             | 446                   | 1    |             | 412                    | 1    |             |
|                   | Male      | 665               | 1.56 | (1.38-1.76) | 628                    | 1.54 | (1.36-1.75) | 600                     | 1.54 | (1.36-1.75) | 381                 | 1.42 | (1.22-1.67) | 679               | 1.54 | (1.37-1.74) | 679                   | 1.54 | (1.36-1.73) | 634                    | 1.55 | (1.36-1.75) |
| Asbestos exposure | No        | 1061              | 1    |             | 1007                   | 1    |             | 962                     | 1    |             | 629                 | 1    |             | 1091              | 1    |             | 1061                  | 1    |             | 1013                   | 1    |             |
|                   | Yes       | 34                | 1.21 | (0.86-1.71) | 34                     | 1.24 | (0.88-1.75) | 33                      | 1.27 | (0.89-1.80) | 20                  | 1.59 | (1.01-2.48) | 34                | 1.21 | (0.86-1.70) | 64                    | 1.31 | (1.02-1.69) | 33                     | 1.28 | (0.90-1.82) |
| JEM1 >15 years    | Reference | 989               | 1    |             | 936                    | 1    |             | 919                     | 1    |             | 587                 | 1    |             | 1015              | 1    |             | 1015                  | 1    |             | 989                    | 1    |             |
|                   | School    | 106               | 0.92 | (0.75-1.12) | 105                    | 0.92 | (0.75-1.12) | 76                      | 0.88 | (0.70-1.11) | 62                  | 0.87 | (0.67-1.14) | 110               | 0.94 | (0.77-1.14) | 110                   | 0.94 | (0.77-1.14) | 57                     | 0.93 | (0.71-1.22) |
| Sex               | Female    | 430               | 1    |             | 413                    | 1    |             | 395                     | 1    |             | 268                 | 1    |             | 446               | 1    |             | 446                   | 1    |             | 412                    | 1    |             |
|                   | Male      | 665               | 1.57 | (1.39-1.77) | 628                    | 1.55 | (1.37-1.76) | 600                     | 1.55 | (1.36-1.76) | 381                 | 1.43 | (1.22-1.67) | 679               | 1.55 | (1.37-1.74) | 679                   | 1.54 | (1.37-1.74) | 634                    | 1.55 | (1.37-1.76) |
| Asbestos exposure | No        | 1073              | 1    |             | 1019                   | 1    |             | 973                     | 1    |             | 634                 | 1    |             | 1103              | 1    |             | 1073                  | 1    |             | 1025                   | 1    |             |
|                   | Yes       | 22                | 1.16 | (0.76-1.77) | 22                     | 1.18 | (0.77-1.80) | 22                      | 1.23 | (0.81-1.89) | 15                  | 1.79 | (1.07-3.00) | 22                | 1.15 | (0.75-1.76) | 52                    | 1.31 | (0.99-1.73) | 21                     | 1.19 | (0.77-1.84) |
| JEM2              | Reference | 989               | 1    |             | 936                    | 1    |             | 919                     | 1    |             | 587                 | 1    |             | 1015              | 1    |             | 1015                  | 1    |             | 989                    | 1    |             |
|                   | School    | 106               | 0.92 | (0.75-1.12) | 105                    | 0.91 | (0.75-1.12) | 76                      | 0.88 | (0.69-1.11) | 62                  | 0.86 | (0.66-1.12) | 110               | 0.94 | (0.77-1.14) | 110                   | 0.93 | (0.77-1.14) | 57                     | 0.93 | (0.71-1.22) |
| Sex               | Female    | 430               | 1    |             | 413                    | 1    |             | 395                     | 1    |             | 268                 | 1    |             | 446               | 1    |             | 446                   | 1    |             | 412                    | 1    |             |
|                   | Male      | 665               | 1.56 | (1.37-1.77) | 628                    | 1.54 | (1.35-1.75) | 600                     | 1.55 | (1.36-1.77) | 381                 | 1.40 | (1.19-1.65) | 679               | 1.54 | (1.36-1.74) | 679                   | 1.52 | (1.34-1.72) | 634                    | 1.54 | (1.36-1.76) |
| Asbestos exposure | No        | 917               | 1    |             | 867                    | 1    |             | 833                     | 1    |             | 550                 | 1    |             | 947               | 1    |             | 917                   | 1    |             | 878                    | 1    |             |
|                   | Yes       | 178               | 1.05 | (0.88-1.24) | 174                    | 1.05 | (0.89-1.25) | 162                     | 1.03 | (0.86-1.23) | 99                  | 1.18 | (0.94-1.47) | 178               | 1.04 | (0.88-1.23) | 208                   | 1.10 | (0.94-1.29) | 168                    | 1.06 | (0.89-1.26) |
| JEM2 >10 years    | Reference | 989               | 1    |             | 936                    | 1    |             | 919                     | 1    |             | 587                 | 1    |             | 1015              | 1    |             | 1015                  | 1    |             | 989                    | 1    |             |
|                   | School    | 106               | 0.91 | (0.75-1.11) | 105                    | 0.91 | (0.74-1.11) | 76                      | 0.87 | (0.69-1.10) | 62                  | 0.86 | (0.66-1.12) | 110               | 0.93 | (0.76-1.13) | 110                   | 0.94 | (0.77-1.14) | 57                     | 0.93 | (0.71-1.21) |
| Sex               | Female    | 430               | 1    |             | 413                    | 1    |             | 395                     | 1    |             | 268                 | 1    |             | 446               | 1    |             | 446                   | 1    |             | 412                    | 1    |             |
|                   | Male      | 665               | 1.56 | (1.38-1.76) | 628                    | 1.54 | (1.36-1.74) | 600                     | 1.54 | (1.35-1.75) | 381                 | 1.42 | (1.21-1.66) | 679               | 1.54 | (1.36-1.73) | 679                   | 1.54 | (1.36-1.73) | 634                    | 1.54 | (1.36-1.74) |
| Asbestos exposure | No        | 1068              | 1    |             | 1014                   | 1    |             | 970                     | 1    |             | 633                 | 1    |             | 1098              | 1    |             | 1068                  | 1    |             | 1019                   | 1    |             |
|                   | Yes       | 27                | 1.47 | (1.00-2.16) | 27                     | 1.50 | (1.02-2.21) | 25                      | 1.47 | (0.99-2.20) | 16                  | 2.58 | (1.57-4.26) | 27                | 1.46 | (0.99-2.14) | 57                    | 1.45 | (1.11-1.90) | 27                     | 1.62 | (1.10-2.39) |
| JEM2 >15 years    | Reference | 989               | 1    |             | 936                    | 1    |             | 919                     | 1    |             | 587                 | 1    |             | 1015              | 1    |             | 1015                  | 1    |             | 989                    | 1    |             |
|                   | School    | 106               | 0.91 | (0.75-1.12) | 105                    | 0.91 | (0.74-1.12) | 76                      | 0.87 | (0.69-1.10) | 62                  | 0.87 | (0.67-1.13) | 110               | 0.93 | (0.77-1.14) | 110                   | 0.94 | (0.77-1.14) | 57                     | 0.93 | (0.71-1.21) |
| Sex               | Female    | 430               | 1    |             | 413                    | 1    |             | 395                     | 1    |             | 268                 | 1    |             | 446               | 1    |             | 446                   | 1    |             | 412                    | 1    |             |
|                   | Male      | 665               | 1.56 | (1.38-1.76) | 628                    | 1.54 | (1.36-1.75) | 600                     | 1.54 | (1.36-1.75) | 381                 | 1.42 | (1.21-1.66) | 679               | 1.54 | (1.36-1.73) | 679                   | 1.54 | (1.37-1.74) | 634                    | 1.54 | (1.36-1.75) |
| Asbestos exposure | No        | 1078              | 1    |             | 1024                   | 1    |             | 979                     | 1    |             | 637                 | 1    |             | 1108              | 1    |             | 1078                  | 1    |             | 1029                   | 1    |             |
|                   | Yes       | 17                | 1.69 | (1.04-2.73) | 17                     | 1.72 | (1.06-2.78) | 16                      | 1.72 | (1.05-2.83) | 12                  | 3.61 | (2.03-6.42) | 17                | 1.68 | (1.04-2.72) | 47                    | 1.52 | (1.13-2.04) | 17                     | 1.89 | (1.17-3.06) |

**Online resource 2: Sensitivity analyses: Cox regression of lymphoma as first cancer, with other cancers and death as competing-risk, with different job exposure matrix models for occupational asbestos exposure adjustment.**

| n                        | From Table 3 or 4<br>114,214 |     |                  | First<br>104,301     |                  |          | Second<br>99,780       |     |                  | Third<br>85,614         |                  |          | Fourth<br>121,098   |     |                  | Fifth<br>121,098 |                  |          | Sixth<br>108,217      |     |                  |
|--------------------------|------------------------------|-----|------------------|----------------------|------------------|----------|------------------------|-----|------------------|-------------------------|------------------|----------|---------------------|-----|------------------|------------------|------------------|----------|-----------------------|-----|------------------|
|                          |                              |     |                  | Born in Denmark (DK) |                  |          | Schoolchildren born in |     |                  | Born after January 1946 |                  |          | ATP missing into no |     |                  | ATP missing into |                  |          | Children from the two |     |                  |
| JEM1                     | Cases                        | HR  | (95% CI)         | Cases                | HR               | (95% CI) | Cases                  | HR  | (95% CI)         | Cases                   | HR               | (95% CI) | Cases               | HR  | (95% CI)         | Cases            | HR               | (95% CI) | Cases                 | HR  | (95% CI)         |
| <b>JEM1</b>              |                              |     |                  |                      |                  |          |                        |     |                  |                         |                  |          |                     |     |                  |                  |                  |          |                       |     |                  |
| Population               |                              |     |                  |                      |                  |          |                        |     |                  |                         |                  |          |                     |     |                  |                  |                  |          |                       |     |                  |
|                          | Reference                    | 683 | 1                | 644                  | 1                | 629      | 1                      | 411 | 1                | 698                     | 1                | 698      | 1                   | 683 | 1                | 683              | 1                | 683      | 1                     | 683 | 1                |
|                          | School                       | 66  | 0.83 (0.65-1.07) | 66                   | 0.84 (0.65-1.09) | 48       | 0.81 (0.61-1.09)       | 38  | 0.77 (0.55-1.07) | 67                      | 0.83 (0.65-1.07) | 67       | 0.83 (0.65-1.07)    | 32  | 0.76 (0.53-1.08) | 67               | 0.83 (0.65-1.07) | 67       | 0.83 (0.65-1.07)      | 32  | 0.76 (0.53-1.09) |
| Sex                      |                              |     |                  |                      |                  |          |                        |     |                  |                         |                  |          |                     |     |                  |                  |                  |          |                       |     |                  |
|                          | Female                       | 288 | 1                | 278                  | 1                | 264      | 1                      | 180 | 1                | 296                     | 1                | 296      | 1                   | 276 | 1                | 296              | 1                | 296      | 1                     | 276 | 1                |
|                          | Male                         | 461 | 1.65 (1.42-1.92) | 432                  | 1.61 (1.38-1.88) | 413      | 1.61 (1.38-1.89)       | 269 | 1.52 (1.25-1.85) | 469                     | 1.63 (1.41-1.90) | 469      | 1.63 (1.40-1.89)    | 439 | 1.62 (1.39-1.90) | 469              | 1.63 (1.40-1.89) | 469      | 1.63 (1.40-1.89)      | 439 | 1.62 (1.39-1.90) |
| Asbestos exposure        |                              |     |                  |                      |                  |          |                        |     |                  |                         |                  |          |                     |     |                  |                  |                  |          |                       |     |                  |
|                          | No                           | 643 | 1                | 606                  | 1                | 577      | 1                      | 388 | 1                | 659                     | 1                | 643      | 1                   | 614 | 1                | 643              | 1                | 643      | 1                     | 614 | 1                |
|                          | Yes                          | 106 | 0.94 (0.76-1.16) | 104                  | 0.95 (0.77-1.18) | 100      | 0.97 (0.78-1.21)       | 61  | 0.99 (0.75-1.30) | 106                     | 0.94 (0.76-1.16) | 122      | 0.96 (0.79-1.17)    | 101 | 0.97 (0.78-1.20) | 122              | 0.96 (0.79-1.17) | 122      | 0.96 (0.79-1.17)      | 101 | 0.97 (0.78-1.20) |
| <b>JEM1 &gt;10 years</b> |                              |     |                  |                      |                  |          |                        |     |                  |                         |                  |          |                     |     |                  |                  |                  |          |                       |     |                  |
| Population               |                              |     |                  |                      |                  |          |                        |     |                  |                         |                  |          |                     |     |                  |                  |                  |          |                       |     |                  |
|                          | Reference                    | 683 | 1                | 644                  | 1                | 629      | 1                      | 411 | 1                | 698                     | 1                | 698      | 1                   | 683 | 1                | 683              | 1                | 683      | 1                     | 683 | 1                |
|                          | School                       | 66  | 0.83 (0.64-1.07) | 66                   | 0.84 (0.65-1.08) | 48       | 0.81 (0.60-1.09)       | 38  | 0.77 (0.55-1.07) | 67                      | 0.83 (0.65-1.07) | 67       | 0.83 (0.65-1.07)    | 32  | 0.76 (0.53-1.08) | 67               | 0.83 (0.65-1.07) | 67       | 0.83 (0.65-1.07)      | 32  | 0.76 (0.53-1.08) |
| Sex                      |                              |     |                  |                      |                  |          |                        |     |                  |                         |                  |          |                     |     |                  |                  |                  |          |                       |     |                  |
|                          | Female                       | 288 | 1                | 278                  | 1                | 264      | 1                      | 180 | 1                | 296                     | 1                | 296      | 1                   | 276 | 1                | 296              | 1                | 296      | 1                     | 276 | 1                |
|                          | Male                         | 461 | 1.63 (1.41-1.89) | 432                  | 1.59 (1.37-1.85) | 413      | 1.60 (1.37-1.87)       | 269 | 1.51 (1.25-1.83) | 469                     | 1.62 (1.40-1.87) | 469      | 1.61 (1.39-1.87)    | 439 | 1.61 (1.39-1.88) | 469              | 1.61 (1.40-1.87) | 469      | 1.61 (1.40-1.87)      | 439 | 1.61 (1.39-1.88) |
| Asbestos exposure        |                              |     |                  |                      |                  |          |                        |     |                  |                         |                  |          |                     |     |                  |                  |                  |          |                       |     |                  |
|                          | No                           | 730 | 1                | 691                  | 1                | 659      | 1                      | 438 | 1                | 746                     | 1                | 730      | 1                   | 697 | 1                | 730              | 1                | 730      | 1                     | 697 | 1                |
|                          | Yes                          | 19  | 0.98 (0.62-1.55) | 19                   | 1.01 (0.64-1.60) | 18       | 1.00 (0.63-1.61)       | 11  | 1.24 (0.68-2.26) | 19                      | 0.98 (0.62-1.55) | 35       | 1.03 (0.73-1.44)    | 18  | 1.01 (0.63-1.62) | 35               | 1.03 (0.73-1.44) | 35       | 1.03 (0.73-1.44)      | 18  | 1.01 (0.63-1.62) |
| <b>JEM1 &gt;15 years</b> |                              |     |                  |                      |                  |          |                        |     |                  |                         |                  |          |                     |     |                  |                  |                  |          |                       |     |                  |
| Population               |                              |     |                  |                      |                  |          |                        |     |                  |                         |                  |          |                     |     |                  |                  |                  |          |                       |     |                  |
|                          | Reference                    | 683 | 1                | 644                  | 1                | 629      | 1                      | 411 | 1                | 698                     | 1                | 698      | 1                   | 683 | 1                | 683              | 1                | 683      | 1                     | 683 | 1                |
|                          | School                       | 66  | 0.83 (0.64-1.07) | 66                   | 0.84 (0.65-1.08) | 48       | 0.81 (0.60-1.09)       | 38  | 0.77 (0.55-1.07) | 67                      | 0.83 (0.65-1.07) | 67       | 0.83 (0.65-1.07)    | 32  | 0.76 (0.53-1.08) | 67               | 0.83 (0.65-1.07) | 67       | 0.83 (0.65-1.07)      | 32  | 0.76 (0.53-1.08) |
| Sex                      |                              |     |                  |                      |                  |          |                        |     |                  |                         |                  |          |                     |     |                  |                  |                  |          |                       |     |                  |
|                          | Female                       | 288 | 1                | 278                  | 1                | 264      | 1                      | 180 | 1                | 296                     | 1                | 296      | 1                   | 276 | 1                | 296              | 1                | 296      | 1                     | 276 | 1                |
|                          | Male                         | 461 | 1.63 (1.40-1.89) | 432                  | 1.59 (1.37-1.85) | 413      | 1.60 (1.37-1.87)       | 269 | 1.51 (1.25-1.83) | 469                     | 1.62 (1.40-1.87) | 469      | 1.61 (1.39-1.87)    | 439 | 1.61 (1.39-1.88) | 469              | 1.61 (1.40-1.87) | 469      | 1.61 (1.40-1.87)      | 439 | 1.61 (1.39-1.88) |
| Asbestos exposure        |                              |     |                  |                      |                  |          |                        |     |                  |                         |                  |          |                     |     |                  |                  |                  |          |                       |     |                  |
|                          | No                           | 736 | 1                | 697                  | 1                | 664      | 1                      | 442 | 1                | 752                     | 1                | 736      | 1                   | 703 | 1                | 736              | 1                | 736      | 1                     | 703 | 1                |
|                          | Yes                          | 13  | 0.99 (0.57-1.72) | 13                   | 1.01 (0.58-1.76) | 13       | 1.06 (0.61-1.85)       | 7   | 1.18 (0.56-2.49) | 13                      | 0.99 (0.57-1.72) | 29       | 1.04 (0.72-1.51)    | 12  | 0.98 (0.55-1.74) | 29               | 1.04 (0.72-1.51) | 29       | 1.04 (0.72-1.51)      | 12  | 0.98 (0.55-1.74) |
| <b>JEM2</b>              |                              |     |                  |                      |                  |          |                        |     |                  |                         |                  |          |                     |     |                  |                  |                  |          |                       |     |                  |
| Population               |                              |     |                  |                      |                  |          |                        |     |                  |                         |                  |          |                     |     |                  |                  |                  |          |                       |     |                  |
|                          | Reference                    | 683 | 1                | 644                  | 1                | 629      | 1                      | 411 | 1                | 698                     | 1                | 698      | 1                   | 683 | 1                | 683              | 1                | 683      | 1                     | 683 | 1                |
|                          | School                       | 66  | 0.83 (0.64-1.07) | 66                   | 0.84 (0.65-1.08) | 48       | 0.81 (0.60-1.09)       | 38  | 0.76 (0.54-1.06) | 67                      | 0.83 (0.65-1.07) | 67       | 0.83 (0.65-1.07)    | 32  | 0.76 (0.53-1.08) | 67               | 0.83 (0.65-1.07) | 67       | 0.83 (0.65-1.07)      | 32  | 0.76 (0.53-1.08) |
| Sex                      |                              |     |                  |                      |                  |          |                        |     |                  |                         |                  |          |                     |     |                  |                  |                  |          |                       |     |                  |
|                          | Female                       | 288 | 1                | 278                  | 1                | 264      | 1                      | 180 | 1                | 296                     | 1                | 296      | 1                   | 276 | 1                | 296              | 1                | 296      | 1                     | 276 | 1                |
|                          | Male                         | 461 | 1.63 (1.40-1.90) | 432                  | 1.59 (1.36-1.86) | 413      | 1.60 (1.36-1.88)       | 269 | 1.48 (1.21-1.80) | 469                     | 1.62 (1.39-1.88) | 469      | 1.61 (1.39-1.88)    | 439 | 1.61 (1.38-1.89) | 469              | 1.61 (1.39-1.88) | 469      | 1.61 (1.39-1.88)      | 439 | 1.61 (1.38-1.89) |
| Asbestos exposure        |                              |     |                  |                      |                  |          |                        |     |                  |                         |                  |          |                     |     |                  |                  |                  |          |                       |     |                  |
|                          | No                           | 632 | 1                | 596                  | 1                | 568      | 1                      | 381 | 1                | 648                     | 1                | 632      | 1                   | 604 | 1                | 632              | 1                | 632      | 1                     | 604 | 1                |
|                          | Yes                          | 117 | 0.99 (0.80-1.22) | 114                  | 1.00 (0.81-1.23) | 109      | 1.01 (0.81-1.25)       | 68  | 1.15 (0.88-1.51) | 117                     | 0.99 (0.81-1.22) | 133      | 1.00 (0.83-1.22)    | 111 | 1.01 (0.82-1.24) | 133              | 1.00 (0.83-1.22) | 133      | 1.00 (0.83-1.22)      | 111 | 1.01 (0.82-1.24) |
| <b>JEM2 &gt;10 years</b> |                              |     |                  |                      |                  |          |                        |     |                  |                         |                  |          |                     |     |                  |                  |                  |          |                       |     |                  |
| Population               |                              |     |                  |                      |                  |          |                        |     |                  |                         |                  |          |                     |     |                  |                  |                  |          |                       |     |                  |
|                          | Reference                    | 683 | 1                | 644                  | 1                | 629      | 1                      | 411 | 1                | 698                     | 1                | 698      | 1                   | 683 | 1                | 683              | 1                | 683      | 1                     | 683 | 1                |
|                          | School                       | 66  | 0.83 (0.64-1.07) | 66                   | 0.84 (0.65-1.08) | 48       | 0.81 (0.60-1.08)       | 38  | 0.76 (0.54-1.05) | 67                      | 0.83 (0.65-1.07) | 67       | 0.83 (0.65-1.07)    | 32  | 0.76 (0.53-1.08) | 67               | 0.83 (0.65-1.07) | 67       | 0.83 (0.65-1.07)      | 32  | 0.76 (0.53-1.08) |
| Sex                      |                              |     |                  |                      |                  |          |                        |     |                  |                         |                  |          |                     |     |                  |                  |                  |          |                       |     |                  |
|                          | Female                       | 288 | 1                | 278                  | 1                | 264      | 1                      | 180 | 1                | 296                     | 1                | 296      | 1                   | 276 | 1                | 296              | 1                | 296      | 1                     | 276 | 1                |
|                          | Male                         | 461 | 1.62 (1.40-1.88) | 432                  | 1.58 (1.36-1.84) | 413      | 1.60 (1.37-1.86)       | 269 | 1.49 (1.23-1.80) | 469                     | 1.61 (1.39-1.86) | 469      | 1.61 (1.39-1.86)    | 439 | 1.60 (1.38-1.86) | 469              | 1.61 (1.39-1.86) | 469      | 1.61 (1.39-1.86)      | 439 | 1.60 (1.38-1.86) |
| Asbestos exposure        |                              |     |                  |                      |                  |          |                        |     |                  |                         |                  |          |                     |     |                  |                  |                  |          |                       |     |                  |
|                          | No                           | 734 | 1                | 695                  | 1                | 663      | 1                      | 439 | 1                | 750                     | 1                | 734      | 1                   | 700 | 1                | 734              | 1                | 734      | 1                     | 700 | 1                |
|                          | Yes                          | 15  | 1.18 (0.71-1.98) | 15                   | 1.22 (0.73-2.04) | 14       | 1.20 (0.71-2.05)       | 10  | 2.31 (1.22-4.35) | 15                      | 1.18 (0.71-1.97) | 31       | 1.13 (0.79-1.62)    | 15  | 1.31 (0.78-2.19) | 31               | 1.13 (0.79-1.62) | 31       | 1.13 (0.79-1.62)      | 15  | 1.31 (0.78-2.19) |
| <b>JEM2 &gt;15 years</b> |                              |     |                  |                      |                  |          |                        |     |                  |                         |                  |          |                     |     |                  |                  |                  |          |                       |     |                  |
| Population               |                              |     |                  |                      |                  |          |                        |     |                  |                         |                  |          |                     |     |                  |                  |                  |          |                       |     |                  |
|                          | Reference                    | 683 | 1                | 644                  | 1                | 629      | 1                      | 411 | 1                | 698                     | 1                | 698      | 1                   | 683 | 1                | 683              | 1                | 683      | 1                     | 683 | 1                |
|                          | School                       | 66  | 0.83 (0.64-1.07) | 66                   | 0.84 (0.65-1.08) | 48       | 0.81 (0.60-1.08)       | 38  | 0.76 (0.55-1.06) | 67                      | 0.83 (0.65-1.07) | 67       | 0.83 (0.65-1.07)    | 32  | 0.76 (0.53-1.08) | 67               | 0.83 (0.65-1.07) | 67       | 0.83 (0.65-1.07)      | 32  | 0.76 (0.53-1.08) |
| Sex                      |                              |     |                  |                      |                  |          |                        |     |                  |                         |                  |          |                     |     |                  |                  |                  |          |                       |     |                  |
|                          | Female                       | 288 | 1                | 278                  | 1                | 264      | 1                      | 180 | 1                | 296                     | 1                | 296      | 1                   | 276 | 1                | 296              | 1                | 296      | 1                     | 276 | 1                |
|                          | Male                         | 461 | 1.62 (1.40-1.88) | 432                  | 1.58 (1.36-1.84) | 413      | 1.60 (1.37-1.86)       | 269 | 1.50 (1.24-1.81) | 469                     | 1.61 (1.39-1.86) | 469      | 1.61 (1.39-1.86)    | 439 | 1.60 (1.38-1.87) | 469              | 1.61 (1.39-1.86) | 469      | 1.61 (1.39-1.86)      | 439 | 1.60 (1.38-1.87) |
| Asbestos exposure        |                              |     |                  |                      |                  |          |                        |     |                  |                         |                  |          |                     |     |                  |                  |                  |          |                       |     |                  |
|                          | No                           | 740 | 1                | 701                  | 1                | 668      | 1                      | 442 | 1                | 756                     | 1                | 740      | 1                   | 706 | 1                | 740              | 1                | 740      | 1                     | 706 | 1                |
|                          | Yes                          | 9   | 1.30 (0.67-2.51) | 9                    | 1.33 (0.69-2.58) | 9        | 1.42 (0.73-2.75)       | 7   | 2.99 (1.41-6.34) | 9                       | 1.30 (0.67-2.51) | 25       | 1.16 (0.78-1.72)    | 9   | 1.45 (0.75-2.81) | 25               | 1.16 (0.78-1.72) | 25       | 1.16 (0.78-1.72)      | 9   | 1.45 (0.75-2.81) |

**Online resource 3: Sensitivity analyses: Cox regression of leukaemia as first cancer, with other cancers and death as competing-risk, with different job exposure matrix models for occupational asbestos exposure adjustment.**

| n                        | From Table 3 or 4<br>114,214 |     |                  | First<br>104,301     |                  |          | Second<br>99,780       |     |                   | Third<br>85,614         |                  |          | Fourth<br>121,098   |     |                  | Fifth<br>121,098 |                  |          | Sixth<br>108,217      |    |          |
|--------------------------|------------------------------|-----|------------------|----------------------|------------------|----------|------------------------|-----|-------------------|-------------------------|------------------|----------|---------------------|-----|------------------|------------------|------------------|----------|-----------------------|----|----------|
|                          | JEM1                         |     |                  | Born in Denmark (DK) |                  |          | Schoolchildren born in |     |                   | Born after January 1946 |                  |          | ATP missing into no |     |                  | ATP missing into |                  |          | Children from the two |    |          |
|                          | Cases                        | HR  | (95% CI)         | Cases                | HR               | (95% CI) | Cases                  | HR  | (95% CI)          | Cases                   | HR               | (95% CI) | Cases               | HR  | (95% CI)         | Cases            | HR               | (95% CI) | Cases                 | HR | (95% CI) |
| <b>JEM1</b>              |                              |     |                  |                      |                  |          |                        |     |                   |                         |                  |          |                     |     |                  |                  |                  |          |                       |    |          |
| Population               |                              |     |                  |                      |                  |          |                        |     |                   |                         |                  |          |                     |     |                  |                  |                  |          |                       |    |          |
|                          | Reference                    | 303 | 1                | 289                  | 1                | 287      | 1                      | 173 | 1                 | 314                     | 1                | 314      | 1                   | 314 | 1                | 303              | 1                |          |                       |    |          |
|                          | School                       | 38  | 1.07 (0.76-1.50) | 37                   | 1.04 (0.74-1.47) | 27       | 1.00 (0.68-1.49)       | 22  | 1.02 (0.66-1.60)  | 41                      | 1.12 (0.81-1.56) | 41       | 1.11 (0.80-1.54)    | 41  | 1.12 (0.81-1.55) | 25               | 1.32 (0.88-1.99) |          |                       |    |          |
| Sex                      |                              |     |                  |                      |                  |          |                        |     |                   |                         |                  |          |                     |     |                  |                  |                  |          |                       |    |          |
|                          | Female                       | 140 | 1                | 133                  | 1                | 130      | 1                      | 86  | 1                 | 148                     | 1                | 148      | 1                   | 148 | 1                | 136              | 1                |          |                       |    |          |
|                          | Male                         | 201 | 1.44 (1.15-1.80) | 193                  | 1.47 (1.17-1.85) | 184      | 1.45 (1.15-1.83)       | 109 | 1.22 (0.90-1.63)  | 207                     | 1.41 (1.14-1.76) | 207      | 1.37 (1.10-1.71)    | 207 | 1.37 (1.10-1.71) | 192              | 1.41 (1.12-1.77) |          |                       |    |          |
| Asbestos exposure        |                              |     |                  |                      |                  |          |                        |     |                   |                         |                  |          |                     |     |                  |                  |                  |          |                       |    |          |
|                          | No                           | 288 | 1                | 274                  | 1                | 267      | 1                      | 162 | 1                 | 302                     | 1                | 288      | 1                   | 288 | 1                | 278              | 1                |          |                       |    |          |
|                          | Yes                          | 53  | 1.07 (0.79-1.46) | 52                   | 1.07 (0.78-1.45) | 47       | 1.00 (0.73-1.38)       | 33  | 1.36 (0.92-2.02)  | 53                      | 1.05 (0.78-1.43) | 67       | 1.23 (0.93-1.62)    | 67  | 1.23 (0.93-1.62) | 50               | 1.08 (0.79-1.48) |          |                       |    |          |
| <b>JEM1 &gt;10 years</b> |                              |     |                  |                      |                  |          |                        |     |                   |                         |                  |          |                     |     |                  |                  |                  |          |                       |    |          |
| Population               |                              |     |                  |                      |                  |          |                        |     |                   |                         |                  |          |                     |     |                  |                  |                  |          |                       |    |          |
|                          | Reference                    | 303 | 1                | 289                  | 1                | 287      | 1                      | 173 | 1                 | 314                     | 1                | 314      | 1                   | 314 | 1                | 303              | 1                |          |                       |    |          |
|                          | School                       | 38  | 1.06 (0.76-1.49) | 37                   | 1.04 (0.74-1.46) | 27       | 0.99 (0.66-1.47)       | 22  | 1.04 (0.66-1.62)  | 41                      | 1.12 (0.81-1.55) | 41       | 1.12 (0.81-1.55)    | 41  | 1.12 (0.81-1.55) | 25               | 1.32 (0.88-1.99) |          |                       |    |          |
| Sex                      |                              |     |                  |                      |                  |          |                        |     |                   |                         |                  |          |                     |     |                  |                  |                  |          |                       |    |          |
|                          | Female                       | 140 | 1                | 133                  | 1                | 130      | 1                      | 86  | 1                 | 148                     | 1                | 148      | 1                   | 148 | 1                | 136              | 1                |          |                       |    |          |
|                          | Male                         | 201 | 1.42 (1.14-1.77) | 193                  | 1.44 (1.15-1.81) | 184      | 1.41 (1.12-1.76)       | 109 | 1.24 (0.93-1.65)  | 207                     | 1.39 (1.12-1.72) | 207      | 1.38 (1.12-1.71)    | 207 | 1.38 (1.12-1.71) | 192              | 1.39 (1.11-1.73) |          |                       |    |          |
| Asbestos exposure        |                              |     |                  |                      |                  |          |                        |     |                   |                         |                  |          |                     |     |                  |                  |                  |          |                       |    |          |
|                          | No                           | 326 | 1                | 311                  | 1                | 299      | 1                      | 186 | 1                 | 340                     | 1                | 326      | 1                   | 326 | 1                | 313              | 1                |          |                       |    |          |
|                          | Yes                          | 15  | 1.78 (1.05-3.00) | 15                   | 1.79 (1.06-3.03) | 15       | 1.89 (1.12-3.19)       | 9   | 2.51 (1.27-4.94)  | 15                      | 1.75 (1.04-2.95) | 29       | 2.00 (1.37-2.94)    | 29  | 2.00 (1.37-2.94) | 15               | 1.93 (1.14-3.26) |          |                       |    |          |
| <b>JEM1 &gt;15 years</b> |                              |     |                  |                      |                  |          |                        |     |                   |                         |                  |          |                     |     |                  |                  |                  |          |                       |    |          |
| Population               |                              |     |                  |                      |                  |          |                        |     |                   |                         |                  |          |                     |     |                  |                  |                  |          |                       |    |          |
|                          | Reference                    | 303 | 1                | 289                  | 1                | 287      | 1                      | 173 | 1                 | 314                     | 1                | 314      | 1                   | 314 | 1                | 303              | 1                |          |                       |    |          |
|                          | School                       | 38  | 1.07 (0.76-1.50) | 37                   | 1.04 (0.74-1.47) | 27       | 1.00 (0.67-1.48)       | 22  | 1.05 (0.67-1.64)  | 41                      | 1.13 (0.81-1.56) | 41       | 1.13 (0.82-1.57)    | 41  | 1.13 (0.82-1.57) | 25               | 1.33 (0.89-2.00) |          |                       |    |          |
| Sex                      |                              |     |                  |                      |                  |          |                        |     |                   |                         |                  |          |                     |     |                  |                  |                  |          |                       |    |          |
|                          | Female                       | 140 | 1                | 133                  | 1                | 130      | 1                      | 86  | 1                 | 148                     | 1                | 148      | 1                   | 148 | 1                | 136              | 1                |          |                       |    |          |
|                          | Male                         | 201 | 1.44 (1.16-1.79) | 193                  | 1.47 (1.17-1.83) | 184      | 1.43 (1.14-1.79)       | 109 | 1.24 (0.93-1.65)  | 207                     | 1.41 (1.14-1.74) | 207      | 1.40 (1.13-1.73)    | 207 | 1.40 (1.13-1.73) | 192              | 1.41 (1.13-1.76) |          |                       |    |          |
| Asbestos exposure        |                              |     |                  |                      |                  |          |                        |     |                   |                         |                  |          |                     |     |                  |                  |                  |          |                       |    |          |
|                          | No                           | 332 | 1                | 317                  | 1                | 305      | 1                      | 187 | 1                 | 346                     | 1                | 332      | 1                   | 332 | 1                | 319              | 1                |          |                       |    |          |
|                          | Yes                          | 9   | 1.56 (0.80-3.04) | 9                    | 1.56 (0.80-3.04) | 9        | 1.64 (0.84-3.19)       | 8   | 3.41 (1.67-6.98)  | 9                       | 1.54 (0.79-3.00) | 23       | 1.94 (1.27-2.96)    | 23  | 1.94 (1.27-2.96) | 9                | 1.68 (0.86-3.27) |          |                       |    |          |
| <b>JEM2</b>              |                              |     |                  |                      |                  |          |                        |     |                   |                         |                  |          |                     |     |                  |                  |                  |          |                       |    |          |
| Population               |                              |     |                  |                      |                  |          |                        |     |                   |                         |                  |          |                     |     |                  |                  |                  |          |                       |    |          |
|                          | Reference                    | 303 | 1                | 289                  | 1                | 287      | 1                      | 173 | 1                 | 314                     | 1                | 314      | 1                   | 314 | 1                | 303              | 1                |          |                       |    |          |
|                          | School                       | 38  | 1.06 (0.76-1.49) | 37                   | 1.04 (0.74-1.46) | 27       | 1.00 (0.67-1.48)       | 22  | 1.04 (0.66-1.61)  | 41                      | 1.12 (0.81-1.55) | 41       | 1.11 (0.80-1.54)    | 41  | 1.11 (0.80-1.54) | 25               | 1.32 (0.88-1.99) |          |                       |    |          |
| Sex                      |                              |     |                  |                      |                  |          |                        |     |                   |                         |                  |          |                     |     |                  |                  |                  |          |                       |    |          |
|                          | Female                       | 140 | 1                | 133                  | 1                | 130      | 1                      | 86  | 1                 | 148                     | 1                | 148      | 1                   | 148 | 1                | 136              | 1                |          |                       |    |          |
|                          | Male                         | 201 | 1.41 (1.12-1.77) | 193                  | 1.43 (1.13-1.81) | 184      | 1.43 (1.13-1.81)       | 109 | 1.24 (0.92-1.67)  | 207                     | 1.38 (1.11-1.72) | 207      | 1.34 (1.07-1.67)    | 207 | 1.34 (1.07-1.67) | 192              | 1.39 (1.10-1.75) |          |                       |    |          |
| Asbestos exposure        |                              |     |                  |                      |                  |          |                        |     |                   |                         |                  |          |                     |     |                  |                  |                  |          |                       |    |          |
|                          | No                           | 281 | 1                | 267                  | 1                | 262      | 1                      | 165 | 1                 | 295                     | 1                | 281      | 1                   | 281 | 1                | 272              | 1                |          |                       |    |          |
|                          | Yes                          | 60  | 1.18 (0.88-1.59) | 59                   | 1.18 (0.87-1.59) | 52       | 1.07 (0.78-1.46)       | 30  | 1.24 (0.82-1.87)  | 60                      | 1.16 (0.87-1.55) | 74       | 1.33 (1.01-1.74)    | 74  | 1.33 (1.01-1.74) | 56               | 1.16 (0.86-1.58) |          |                       |    |          |
| <b>JEM2 &gt;10 years</b> |                              |     |                  |                      |                  |          |                        |     |                   |                         |                  |          |                     |     |                  |                  |                  |          |                       |    |          |
| Population               |                              |     |                  |                      |                  |          |                        |     |                   |                         |                  |          |                     |     |                  |                  |                  |          |                       |    |          |
|                          | Reference                    | 303 | 1                | 289                  | 1                | 287      | 1                      | 173 | 1                 | 314                     | 1                | 314      | 1                   | 314 | 1                | 303              | 1                |          |                       |    |          |
|                          | School                       | 38  | 1.05 (0.75-1.48) | 37                   | 1.03 (0.73-1.45) | 27       | 0.98 (0.66-1.46)       | 22  | 1.03 (0.66-1.60)  | 41                      | 1.11 (0.80-1.54) | 41       | 1.12 (0.81-1.55)    | 41  | 1.12 (0.81-1.55) | 25               | 1.31 (0.87-1.97) |          |                       |    |          |
| Sex                      |                              |     |                  |                      |                  |          |                        |     |                   |                         |                  |          |                     |     |                  |                  |                  |          |                       |    |          |
|                          | Female                       | 140 | 1                | 133                  | 1                | 130      | 1                      | 86  | 1                 | 148                     | 1                | 148      | 1                   | 148 | 1                | 136              | 1                |          |                       |    |          |
|                          | Male                         | 201 | 1.42 (1.14-1.77) | 193                  | 1.44 (1.15-1.80) | 184      | 1.41 (1.13-1.77)       | 109 | 1.25 (0.94-1.66)  | 207                     | 1.39 (1.12-1.72) | 207      | 1.39 (1.12-1.72)    | 207 | 1.39 (1.12-1.72) | 192              | 1.39 (1.11-1.73) |          |                       |    |          |
| Asbestos exposure        |                              |     |                  |                      |                  |          |                        |     |                   |                         |                  |          |                     |     |                  |                  |                  |          |                       |    |          |
|                          | No                           | 329 | 1                | 314                  | 1                | 303      | 1                      | 189 | 1                 | 343                     | 1                | 329      | 1                   | 329 | 1                | 316              | 1                |          |                       |    |          |
|                          | Yes                          | 12  | 2.14 (1.19-3.84) | 12                   | 2.16 (1.20-3.88) | 11       | 2.09 (1.14-3.85)       | 6   | 3.35 (1.47-7.62)  | 12                      | 2.11 (1.18-3.78) | 26       | 2.23 (1.49-3.33)    | 26  | 2.23 (1.49-3.33) | 12               | 2.35 (1.31-4.22) |          |                       |    |          |
| <b>JEM2 &gt;15 years</b> |                              |     |                  |                      |                  |          |                        |     |                   |                         |                  |          |                     |     |                  |                  |                  |          |                       |    |          |
| Population               |                              |     |                  |                      |                  |          |                        |     |                   |                         |                  |          |                     |     |                  |                  |                  |          |                       |    |          |
|                          | Reference                    | 303 | 1                | 289                  | 1                | 287      | 1                      | 173 | 1                 | 314                     | 1                | 314      | 1                   | 314 | 1                | 303              | 1                |          |                       |    |          |
|                          | School                       | 38  | 1.06 (0.76-1.48) | 37                   | 1.03 (0.73-1.45) | 27       | 0.99 (0.67-1.47)       | 22  | 1.04 (0.67-1.62)  | 41                      | 1.11 (0.80-1.54) | 41       | 1.13 (0.81-1.56)    | 41  | 1.13 (0.81-1.56) | 25               | 1.32 (0.88-1.99) |          |                       |    |          |
| Sex                      |                              |     |                  |                      |                  |          |                        |     |                   |                         |                  |          |                     |     |                  |                  |                  |          |                       |    |          |
|                          | Female                       | 140 | 1                | 133                  | 1                | 130      | 1                      | 86  | 1                 | 148                     | 1                | 148      | 1                   | 148 | 1                | 136              | 1                |          |                       |    |          |
|                          | Male                         | 201 | 1.43 (1.15-1.78) | 193                  | 1.45 (1.16-1.82) | 184      | 1.42 (1.14-1.79)       | 109 | 1.25 (0.94-1.67)  | 207                     | 1.40 (1.13-1.73) | 207      | 1.41 (1.14-1.74)    | 207 | 1.41 (1.14-1.74) | 192              | 1.40 (1.12-1.75) |          |                       |    |          |
| Asbestos exposure        |                              |     |                  |                      |                  |          |                        |     |                   |                         |                  |          |                     |     |                  |                  |                  |          |                       |    |          |
|                          | No                           | 333 | 1                | 318                  | 1                | 307      | 1                      | 190 | 1                 | 347                     | 1                | 333      | 1                   | 333 | 1                | 320              | 1                |          |                       |    |          |
|                          | Yes                          | 8   | 2.59 (1.28-5.26) | 8                    | 2.60 (1.28-5.27) | 7        | 2.41 (1.13-5.13)       | 5   | 5.25 (2.14-12.86) | 8                       | 2.56 (1.26-5.19) | 22       | 2.39 (1.55-3.69)    | 22  | 2.39 (1.55-3.69) | 8                | 2.89 (1.43-5.87) |          |                       |    |          |
